# Supplementary material for: Unravelling the Link between Psychological Distress and Liver Disease: Insights from an Anxiety-like Rat Model and Metabolomics Analysis
Source: MDPI journal article supplement (doi:10.3390/ijms241713356), 2023-08-29
Supplement: s1 [file s1]

**Supplementary Materials for**  
**Unravelling the link between psychological distress and liver disease:**  
**Insights from an anxiety-like rat model and metabolomics analysis**

**Supplementary Figure Legends**

**Supplementary Figure S1.** Overview of instrument stability. (A) PCA scatter plot of the QCs in negative ion mode; (B) PCA scatter plot of the QCs in positive ion mode.

**Supplementary Figure S2.** Overview of plasma metabolomics in study samples. (A) PCA scatter plot of metabolic profiles in positive ion mode. (B) PCA scatter plot of metabolic profiles in negative ion mode.

**Supplementary Figure S3.** (A) Permutation tests corresponding to OPLS-DA model in positive ion mode; (B) Permutation tests corresponding to OPLS-DA model in negative ion mode.

## Supplementary Figures

### Supplementary Figure S1

**A**

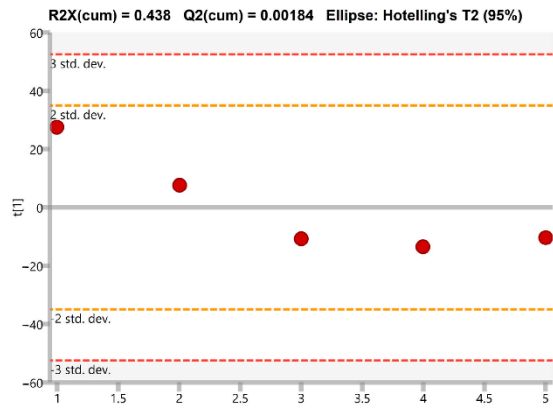

**B**

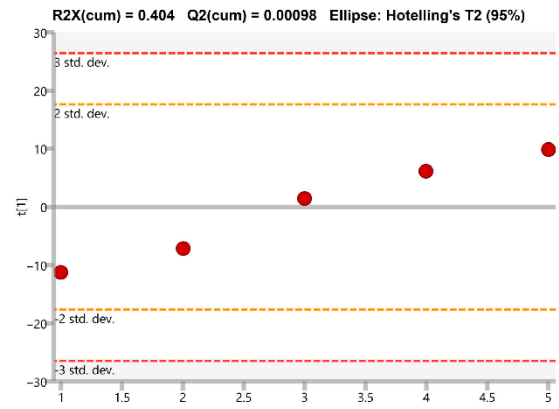

## Supplementary Figure S2

**A**

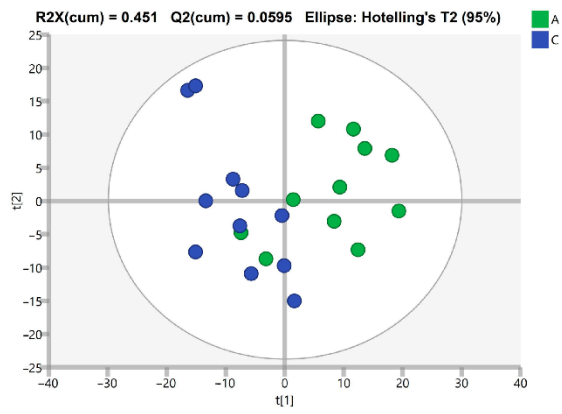

**B**

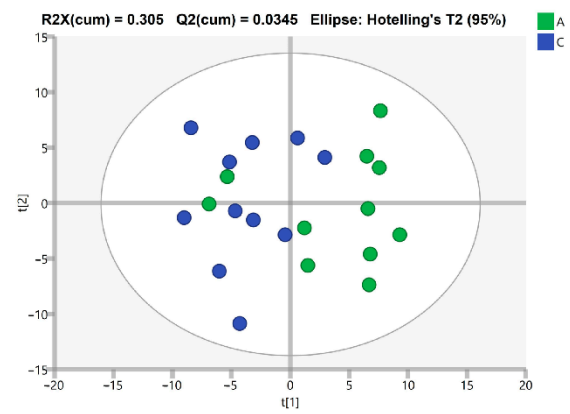

## Supplementary Figure S3

**A**

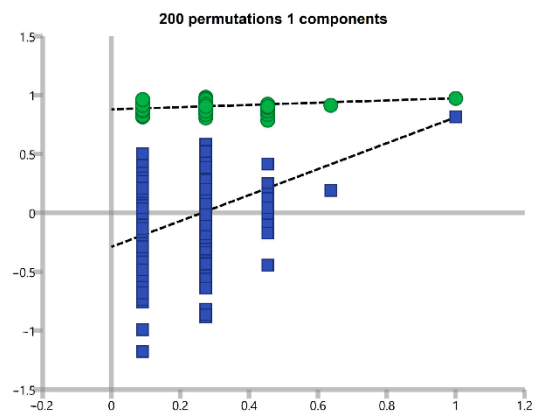

**B**

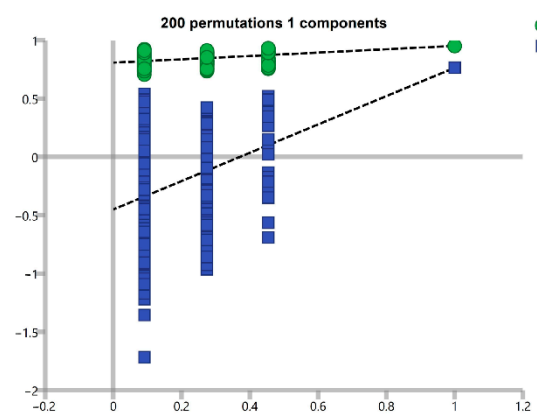

## Supplementary Tables

### Supplementary Table S1

| Antibodies to list                       |                           |                |               |
|------------------------------------------|---------------------------|----------------|---------------|
| Antibody                                 | merchant                  | Article number | dilution rate |
| Phospho-EGF Receptor<br>(Tyr1068) (D7A5) | Cell Signaling Technology | #3777          | 1:1000        |
| EGFR                                     | PTMBIO                    | PTM-5042       | 1:1000        |
| Phospho-PI3K p85 alpha<br>(Tyr607)       | Affinity                  | AF3241         | 1:1000        |
| PI3 Kinase p85 alpha                     | Abmart                    | T40115F        | 1:1000        |
| Phospho-Akt (Thr308)<br>(D25E6)          | Cell Signaling Technology | #13038         | 1:1000        |
| anti-AKT                                 | Abmart                    | T55561F        | 1:1000        |
| Phospho-IKB alpha<br>(Ser32/Ser36)       | Affinity                  | AF2002         | 1:1000        |
| IKB alpha                                | Servicebio                | GB13212-1      | 1:1000        |
| Phospho-NF-κB p65<br>(Ser536)            | Affinity                  | AF2006         | 1:1000        |
| NF-κB p65                                | Servicebio                | GB11997        | 1:1000        |
| Phospho- NF kappaB<br>p105/p50 (Ser337)  | Affinity                  | AF3219         | 1:1000        |
| NF kappaB p105/p50                       | Affinity                  | AF6217         | 1:1000        |
| TNF-α (52B83)                            | Santa Cruz Biotechnology  | Sc-52746       | 1:500         |
| IL-1β (B122)                             | Santa Cruz Biotechnology  | Sc-12742       | 1:500         |
| IL-6 (D5W4V)                             | Cell Signaling Technology | #12912         | 1:1000        |
| Anti-rabbit IgG, HRP-linked<br>Antibody  | Cell Signaling Technology | #7074          | 1:2000        |
| Goat Anti-Mouse IgG (H+L)<br>HRP         | Servicebio                | GB23301        | 1:2000        |

**Supplementary Table S2**

| Primers used for qPCR testing |           |                          |
|-------------------------------|-----------|--------------------------|
| Gene symbol                   | direction | Gene sequence            |
| <i>EGFR</i>                   | Forward   | TCCCAAAGAAGCCAAGCCGAATG  |
|                               | Reverse   | TGCCTCTTCAATGTCATGCTCCAC |
| <i>PI3KR1</i>                 | Forward   | GTGGTAGATGGCGAAGTCA      |
|                               | Reverse   | CAGGGAGGTGTGTTGGTAA      |
| <i>AKT1</i>                   | Forward   | ATTGAGCGCACCTTCCA        |
|                               | Reverse   | TTTGAGTCCATCAGCCACA      |
| <i>NFKB1A</i>                 | Forward   | TGAAGGACGAGGATTACGA      |
|                               | Reverse   | CCAAGTGCAGGAACGAG        |
| <i>NFκB1</i>                  | Forward   | CCCCTGAGAAAGAAACACA      |
|                               | Reverse   | CCTGAAACCCCACATCC        |
| <i>RELA</i>                   | Forward   | ATCCAAAGCAACGCTCCTA      |
|                               | Reverse   | CAATGTCCCCTCCTGGTC       |
| <i>GAPDH</i>                  | Forward   | GACATGCCGCCTGGAGAAAC     |
|                               | Reverse   | AGCCCAGGATGCCCTTTAGT     |

**Supplementary Table S3**

The differential metabolites between Anxiety and Control

| Compound                                                                             | Mass     | RT (min) | P value  | VIP  | Log2FC | HMDB        | Mode |
|--------------------------------------------------------------------------------------|----------|----------|----------|------|--------|-------------|------|
| 1,3-Dimethyluracil                                                                   | 140.0593 | 1.35     | 2.00E-03 | 1.57 | -0.16  | HMDB0002144 | Pos  |
| Bis(2-hydroxypropyl)<br>amine                                                        | 133.1104 | 0.96     | 1.00E-03 | 1.68 | -0.52  | HMDB0251354 | Pos  |
| (R)-1-O-[b-D-<br>Glucopyranosyl-(1->6)-b-<br>D-glucopyranoside]-1,3-<br>octanediol   | 470.2368 | 6.28     | 0.00E+00 | 1.92 | 0.30   | HMDB0032799 | Pos  |
| n-Butyl-2-cyanoacrylate                                                              | 153.0782 | 1.41     | 1.00E-03 | 1.80 | -0.43  | HMDB0249472 | Pos  |
| Choline                                                                              | 104.1075 | 1.45     | 1.00E-03 | 1.62 | -0.53  | HMDB0000097 | Pos  |
| 2-Hydroxy-dAMP                                                                       | 347.063  | 1.40     | 3.00E-03 | 1.53 | -0.30  | HMDB0059594 | Pos  |
| Pirimicarb                                                                           | 238.1415 | 3.80     | 3.00E-02 | 1.10 | -0.40  | HMDB0256598 | Pos  |
| PS(P-<br>20:0/22:6(4Z,7Z,10Z,13Z<br>,16Z,19Z))                                       | 847.5735 | 16.80    | 1.10E-02 | 1.28 | 0.53   | HMDB0256890 | Pos  |
| Glutamyl-asparagine                                                                  | 261.0957 | 0.97     | 7.00E-03 | 1.48 | -0.45  | HMDB0028814 | Pos  |
| 2-Acetyl-1,5,6,7-<br>tetrahydro-6-hydroxy-7-<br>(hydroxymethyl)-4H-<br>azepine-4-one | 199.0838 | 1.41     | 0.00E+00 | 1.92 | -0.53  | HMDB0035177 | Pos  |
| N-(1-Deoxy-1-<br>fructosyl)serine                                                    | 267.0954 | 1.44     | 1.90E-02 | 1.30 | -0.41  | HMDB0037842 | Pos  |
| Osmaronin                                                                            | 259.103  | 3.32     | 0.00E+00 | 1.92 | -0.79  | HMDB0032769 | Pos  |
| 2-Methylpropyl formate                                                               | 102.0682 | 0.96     | 4.10E-02 | 1.24 | -0.30  | HMDB0031247 | Pos  |
| 3-Hydroxy-2-pentanone                                                                | 102.0677 | 1.46     | 2.00E-03 | 1.58 | -0.59  | HMDB0031516 | Pos  |
| Ganoderic acid H                                                                     | 572.2979 | 12.82    | 1.00E-03 | 1.73 | -1.43  | HMDB0035987 | Pos  |
| Glucosyl passiflorate                                                                | 696.4122 | 5.85     | 3.00E-02 | 1.17 | -0.22  | HMDB0038141 | Pos  |
| p-Anisaldehyde                                                                       | 136.0516 | 1.41     | 0.00E+00 | 1.88 | -0.44  | HMDB0029686 | Pos  |
| Sulfolane                                                                            | 120.0255 | 9.44     | 4.50E-02 | 1.05 | -0.38  | HMDB0258594 | Pos  |
| Methionine                                                                           | 149.0508 | 1.35     | 0.00E+00 | 1.88 | -0.53  | HMDB0002005 | Pos  |
| Asp Val                                                                              | 232.1049 | 1.39     | 4.00E-02 | 1.23 | -0.44  | HMDB0028766 | Pos  |
| Threoninyl-Valine                                                                    | 218.1276 | 8.02     | 2.00E-03 | 1.34 | -0.23  | HMDB0304791 | Pos  |
| 5-Hexyltetrahydro-2-oxo-<br>3-furancarboxylic acid                                   | 214.1198 | 7.49     | 9.00E-03 | 1.37 | 0.27   | HMDB0030984 | Pos  |
| Naringenin 7-O-glucoside                                                             | 434.1212 | 3.87     | 5.00E-03 | 1.53 | -0.31  | HMDB0304708 | Pos  |
| Gabapentin                                                                           | 171.1257 | 5.37     | 3.10E-02 | 1.04 | -0.41  | HMDB0005015 | Pos  |
| Alizapride                                                                           | 315.1671 | 3.53     | 3.30E-02 | 1.19 | -0.44  | HMDB0015494 | Pos  |
| Spermidine                                                                           | 145.1573 | 0.80     | 3.50E-02 | 1.19 | 0.41   | HMDB0001257 | Pos  |

|                                         |          |       |          |      |       |             |     |
|-----------------------------------------|----------|-------|----------|------|-------|-------------|-----|
| Staurosporine                           | 466.2019 | 14.37 | 1.60E-02 | 1.34 | -0.32 | HMDB0247152 | Pos |
| Acetone oxime                           | 73.0531  | 1.35  | 1.00E-03 | 1.79 | -0.37 | HMDB0247913 | Pos |
| 2-Methylcitrate                         | 206.0428 | 0.83  | 4.60E-02 | 1.33 | -0.21 | HMDB0000379 | Pos |
| Pivaloylcarnitine                       | 246.1697 | 4.49  | 1.70E-02 | 1.30 | -0.39 | HMDB0041993 | Pos |
| Fludioxonil                             | 248.0396 | 1.33  | 5.00E-03 | 1.42 | -0.34 | HMDB0252328 | Pos |
| Cyclocreatine                           | 143.0692 | 1.38  | 2.00E-03 | 1.66 | -0.31 | HMDB0250642 | Pos |
| N-palmitoyl glutamine                   | 384.2972 | 12.93 | 4.00E-03 | 1.68 | -0.43 | HMDB0241924 | Pos |
| Benserazide                             | 257.1021 | 11.59 | 4.80E-02 | 1.06 | 0.14  | HMDB0248960 | Pos |
| Indoramin                               | 347.2019 | 3.80  | 4.70E-02 | 1.24 | -0.31 | HMDB0253479 | Pos |
| Decanoylcholine                         | 258.2425 | 9.83  | 0.00E+00 | 1.86 | -0.22 | HMDB0013228 | Pos |
| Acrimarine H                            | 513.1812 | 0.97  | 1.90E-02 | 1.42 | 0.37  | HMDB0038599 | Pos |
| Heptyl acetate                          | 158.13   | 8.92  | 1.00E-03 | 1.25 | -0.14 | HMDB0031480 | Pos |
| 1-Pyrroline-5-carboxylic acid           | 113.0478 | 1.35  | 1.00E-03 | 1.67 | -0.22 | HMDB0001301 | Pos |
| Dihydrojasmonic Acid, Methyl Ester      | 226.1562 | 10.72 | 3.00E-03 | 1.56 | -0.18 | HMDB0031740 | Pos |
| 6,8-Dihydroxypurine                     | 152.0343 | 1.36  | 0.00E+00 | 2.00 | -0.44 | HMDB0011473 | Neg |
| D-Pantothenic acid                      | 219.1111 | 3.31  | 8.00E-03 | 1.59 | -0.39 | HMDB0000210 | Neg |
| Acetic acid                             | 60.0207  | 0.94  | 3.10E-02 | 1.50 | -0.50 | HMDB0000042 | Neg |
| Mammeigin                               | 404.1642 | 14.37 | 1.40E-02 | 1.19 | 0.69  | HMDB0030785 | Neg |
| Scarlet Red                             | 380.1645 | 14.54 | 7.00E-03 | 1.33 | 0.94  | HMDB0258560 | Neg |
| LysoPE(18:1(11Z)/0:0)                   | 479.3003 | 12.63 | 4.10E-02 | 1.26 | 0.53  | HMDB0011505 | Neg |
| LysoPE(24:6(6Z,9Z,12Z,15Z,18Z,21Z)/0:0) | 553.3154 | 11.70 | 3.50E-02 | 1.19 | 0.28  | HMDB0011529 | Neg |
| Furathiocarb                            | 382.1587 | 14.16 | 5.00E-03 | 1.34 | 0.66  | HMDB0252533 | Neg |
| Dephospho-CoA                           | 687.1473 | 3.20  | 1.90E-02 | 1.24 | 0.58  | HMDB0001373 | Neg |
| Erythronic acid                         | 136.0373 | 1.05  | 2.60E-02 | 1.17 | -0.50 | HMDB0000613 | Neg |
| Nicotinamide riboside                   | 255.0986 | 2.84  | 4.90E-02 | 1.40 | 0.61  | HMDB0000855 | Neg |
| N-Acetyl-4-O-acetylneuraminic acid      | 351.1162 | 1.40  | 0.00E+00 | 1.82 | -0.51 | HMDB0000796 | Neg |
| Meta-Tyrosine                           | 181.074  | 1.41  | 1.00E-03 | 1.85 | -0.34 | HMDB0059720 | Neg |
| 1-O-Galloyl-beta-D-glucose              | 332.0717 | 6.65  | 3.50E-02 | 1.17 | -0.64 | HMDB0301708 | Neg |
| Riboflavin                              | 376.1372 | 4.59  | 2.10E-02 | 1.47 | -0.28 | HMDB0000244 | Neg |
| Flavine mononucleotide (FMN)            | 456.1041 | 4.20  | 2.00E-03 | 1.43 | -0.19 | HMDB0001520 | Neg |
| PS(18:0/0:0)                            | 525.3056 | 14.39 | 2.00E-03 | 1.61 | -0.74 | HMDB0240606 | Neg |
| Adenosine 2'-phosphate                  | 347.064  | 1.34  | 7.00E-03 | 1.58 | 2.09  | HMDB0011617 | Neg |
| Fagomine                                | 147.0896 | 3.31  | 1.50E-02 | 1.66 | -0.37 | HMDB0033453 | Neg |
| Linoleoyl glycine                       | 337.2613 | 13.29 | 9.00E-03 | 1.71 | -0.33 | HMDB0241917 | Neg |
| L-Homoserine lactone                    | 101.0479 | 0.92  | 5.00E-02 | 1.33 | -0.30 | HMDB0255213 | Neg |



## Supplementary Statistics Table S4

### The differential pathways between Anxiety and Control

| Metabolic pathway                           | Differential metabolites                  | P value  |
|---------------------------------------------|-------------------------------------------|----------|
| Riboflavin metabolism                       | Riboflavin; FMN                           | 6.71E-04 |
| Pantothenate and CoA biosynthesis           | Dephospho-CoA; Pantothenate               | 1.74E-02 |
| Arginine and proline metabolism             | Spermidine; (S)-1-Pyrroline-5-carboxylate | 6.32E-02 |
| Nicotinate and nicotinamide metabolism      | Nicotinamide-beta-riboside                | 1.53E-01 |
| beta-Alanine metabolism                     | Spermidine                                | 2.08E-01 |
| Pyruvate metabolism                         | Acetate                                   | 2.17E-01 |
| Glycolysis / Gluconeogenesis                | Acetate                                   | 2.51E-01 |
| Alanine, aspartate and glutamate metabolism | (S)-1-Pyrroline-5-carboxylate             | 2.68E-01 |
| Glutathione metabolism                      | Spermidine                                | 2.68E-01 |
| Glyoxylate and dicarboxylate metabolism     | Acetate                                   | 3.00E-01 |
| Glycine, serine and threonine metabolism    | Choline                                   | 3.08E-01 |
| Glycerophospholipid metabolism              | Choline                                   | 3.31E-01 |

**Supplementary Table S5**

## Statistical analysis of changes in anxiety index after stress

| Group   | Number of examples | $M(P25\sim P75)$      | $z$    | $p$   |
|---------|--------------------|-----------------------|--------|-------|
| Control | 8                  | 80.872(74.582,82.494) | -2.205 | 0.027 |
| Anxiety | 8                  | 86.474(80.982,89.531) |        |       |

The normality test results of group C and group A were 0.048 and 0.237, respectively, which did not meet the normality, and the homogeneity test result was 0.838, which satisfied the homogeneity of variance, and the difference was statistically significant by using two independent samples of nonparametric Mann-Whitney U,  $p<0.05$ .

Statistical analysis of the change in total distance of action  
in post-stress open field experiments

| Group   | Number of examples | $\bar{x}\pm s$    | $t$   | $p$   |
|---------|--------------------|-------------------|-------|-------|
| Control | 8                  | 7.605 $\pm$ 2.585 | 1.129 | 0.278 |
| Anxiety | 8                  | 6.243 $\pm$ 2.225 |       |       |

The normality test results of group C and group A were 0.723 and 0.407, respectively, satisfying normality, and the homogeneity of variance test result was 0.678, satisfying homogeneity of variance, and two independent samples were used t-test,  $P<0.05$ , which was statistically significant.

Statistical analysis of time variation in the central region of  
post-stress open field experiments

| Group   | Number of examples | $\bar{x}\pm s$     | $t$   | $p$   |
|---------|--------------------|--------------------|-------|-------|
| Control | 8                  | 13.029 $\pm$ 7.857 | 2.454 | 0.028 |
| Anxiety | 8                  | 5.023 $\pm$ 4.841  |       |       |

The normality test results of group C and group A were 0.275 and 0.320, respectively, satisfying normality, and the homogeneity test result was 0.052, satisfying homogeneity of variance, and two independent samples were used t-test,  $P<0.05$ , which was statistically significant.

Statistical analysis of immobility time variation in  
forced swimming experiment after stress

| Group   | Number of examples | $\bar{x}\pm s$     | $t$    | $p$   |
|---------|--------------------|--------------------|--------|-------|
| Control | 8                  | 36.501 $\pm$ 4.523 | 12.960 | 0.000 |
| Anxiety | 8                  | 10.098 $\pm$ 3.570 |        |       |

The normality test results of group C and group A were 0.965 and 0.669, respectively, satisfying normality, and the homogeneity test result was 0.572, satisfying the homogeneity of variance, and the  $p<0.05$  was used for the t-test of two independent samples, which was statistically significant.

## Statistical analysis of sugar water preference rate change in

#### sugar water preference experiment after stress

| Group   | Number of examples | $M(P25\sim P75)$      | $z$    | $p$   |
|---------|--------------------|-----------------------|--------|-------|
| Control | 8                  | 96.776(87.858,99.722) | -3.363 | 0.001 |
| Anxiety | 8                  | 42.222(26.608,52.228) |        |       |

The normality test results of group C and group A were 0.041 and 0.694, respectively, which did not meet the normality, and the homogeneity of variance test result was 0.108, which satisfied the homogeneity of variance, and two independent samples were used nonparametric Mann-Whitney U,  $p<0.05$ , which were statistically significant.

#### Statistical analysis of weight change during animal experiments

| Group   | Number of examples | $\bar{x}\pm s$      | $t$    | $p$   |
|---------|--------------------|---------------------|--------|-------|
| Control | 8                  | 91.787 $\pm$ 7.250  | -7.896 | 0.000 |
| Anxiety | 8                  | 49.250 $\pm$ 13.401 |        |       |

The normality test results of group C and group A were 0.275 and 0.112, respectively, satisfying normality, and the homogeneity test result was 0.153, satisfying the homogeneity of variance, and the test of two independent samples was used,  $p<0.05$ , which was statistically significant.

#### Statistical analysis of liver coefficient changes in animals

| Group   | Number of examples | $\bar{x}\pm s$    | $t$   | $p$   |
|---------|--------------------|-------------------|-------|-------|
| Control | 8                  | 2.912 $\pm$ 0.596 | 9.695 | 0.000 |
| Anxiety | 8                  | 3.445 $\pm$ 0.145 |       |       |

The normality test results of group C and group A were 0.266 and 0.729, respectively, satisfying normality, and the homogeneity test result was 0.068, satisfying the homogeneity of variance, and the  $p<0.05$  was used for the t-test of two independent samples, which was statistically significant.

#### Statistical analysis of changes in ALP viability in animal serum

| Group   | Number of examples | $M(P25\sim P75)$      | $z$    | $p$   |
|---------|--------------------|-----------------------|--------|-------|
| Control | 8                  | 17.934(15.279,20.127) | -3.151 | 0.002 |
| Anxiety | 8                  | 22.022(20.460,25.141) |        |       |

The normality test results of group C and group A were 0.141 and 0.042, respectively, which did not meet the normality, and the homogeneity of variance test result was 0.441, which satisfied the homogeneity of variance, and two independent samples were used nonparametric Mann-Whitney U,  $p<0.05$ , and the difference was statistically significant.

#### Statistical analysis of changes in AST viability in animal serum

| Group   | Number of examples | $M(P25\sim P75)$      | $z$    | $p$   |
|---------|--------------------|-----------------------|--------|-------|
| Control | 8                  | 23.522(18.621,29.463) | -3.361 | 0.001 |
| Anxiety | 8                  | 61.888(42.697,84.061) |        |       |

The normality test results of group C and group A were 0.794 and 0.125, respectively, satisfying normality,

and the homogeneity test result was 0.005, which did not meet the homogeneity of variance, and two independent samples were used nonparametric Mann-Whitney U,  $p < 0.05$ , which were statistically significant.

#### Statistical analysis of changes in ALT viability in animal serum

| Group   | Number of examples | $M(P25\sim P75)$      | $z$    | $p$   |
|---------|--------------------|-----------------------|--------|-------|
| Control | 8                  | 25.278(21.061,32.654) | -3.361 | 0.001 |
| Anxiety | 8                  | 47.218(42.735,65.748) |        |       |

The normality test results of group C and group A were 0.719 and 0.111, respectively, satisfying normality, and the homogeneity test result was 0.018, which did not meet the homogeneity of variance, and two independent samples were used nonparametric Mann-Whitney U,  $p < 0.05$ , which were statistically significant.

#### Statistical analysis of changes in AST/ALT ratio in animal serum

| Group   | Number of examples | $M(P25\sim P75)$   | $z$    | $p$   |
|---------|--------------------|--------------------|--------|-------|
| Control | 8                  | 0.944(0.834,1.022) | -2.415 | 0.016 |
| Anxiety | 8                  | 1.161(1.043,1.438) |        |       |

The normality test results of group C and group A were 0.712 and 0.577, respectively, satisfying normality, and the homogeneity test result was 0.023, which did not meet the homogeneity of variance, and two independent samples were used nonparametric Mann-Whitney U,  $p < 0.05$ , which were statistically significant.

#### Statistical analysis of area of inflammatory infiltrates in HE staining

| Group   | Number of examples | $M(P25\sim P75)$                 | $z$    | $p$   |
|---------|--------------------|----------------------------------|--------|-------|
| Control | 8                  | 9927.092(7215.988,16496.312)     | -3.361 | 0.001 |
| Anxiety | 8                  | 113934.060(79969.061,201185.626) |        |       |

The normality test results of group C and group A were 0.249 and 0.047, respectively, which did not meet the normality, and the homogeneity test result was 0.000, which did not meet the homogeneity of variance, and two independent samples were used nonparametric Mann-Whitney U,  $p < 0.05$ , which were statistically significant.

#### Statistical analysis of changes in CRH content in animal serum

| Group   | Number of examples | $\bar{x} \pm s$    | $t$   | $p$   |
|---------|--------------------|--------------------|-------|-------|
| Control | 6                  | 13.706 $\pm$ 1.005 | 2.237 | 0.049 |
| Anxiety | 6                  | 15.690 $\pm$ 1.925 |       |       |

The normality test results of group C and group A were 0.132 and 0.125, respectively, satisfying normality, and the homogeneity of variance test result was 0.051, satisfying the homogeneity of variance, and the difference was statistically significant by using two independent samples t-test,  $p < 0.05$ .

#### Statistical analysis of changes in ACTH content in animal serum

| Group | Number of examples | $\bar{x} \pm s$ | $t$ | $p$ |
|-------|--------------------|-----------------|-----|-----|
|-------|--------------------|-----------------|-----|-----|

|         |   |              |        |       |
|---------|---|--------------|--------|-------|
| Control | 6 | 18.182±0.570 | -2.903 | 0.016 |
| Anxiety | 6 | 18.950±0.309 |        |       |

The normality test results of group C and group A were 0.139 and 0.637, respectively, satisfying normality, and the homogeneity test result was 0.084, satisfying homogeneity of variance, and two independent samples were used t-test,  $p<0.05$ , which was statistically significant.

#### Statistical analysis of changes in CORT content in animal serum

| Group   | Number of examples | $\bar{x}\pm s$ | $t$   | $p$   |
|---------|--------------------|----------------|-------|-------|
| Control | 6                  | 5.723±1.130    | 6.502 | 0.000 |
| Anxiety | 6                  | 10.487±1.395   |       |       |

The normality test results of group C and group A were 0.365 and 0.392, respectively, satisfying normality, and the homogeneity test result was 0.457, satisfying the homogeneity of variance, and the test of two independent samples was used,  $p<0.05$ , and the difference was statistically significant.

#### Statistical analysis of changes in CRH content in animal brains

| Group   | Number of examples | $M(P25\sim P75)$      | $z$    | $p$   |
|---------|--------------------|-----------------------|--------|-------|
| Control | 6                  | 16.920(16.363,18.009) | -2.242 | 0.025 |
| Anxiety | 6                  | 19.474(19.086,20.335) |        |       |

The normality test results of group C and group A were 0.021 and 0.403, respectively, which did not meet the normality, and the homogeneity of variance test result was 0.361, which satisfied the homogeneity of variance, and two independent samples were used nonparametric Mann-Whitney U,  $p<0.05$ , and the difference was statistically significant.

#### Statistical analysis of changes in ACTH content in animal brains

| Group   | Number of examples | $\bar{x}\pm s$ | $t$   | $p$   |
|---------|--------------------|----------------|-------|-------|
| Control | 6                  | 20.052±1.036   | 4.123 | 0.002 |
| Anxiety | 6                  | 22.541±1.055   |       |       |

The normality test results of group C and group A were 0.777 and 0.512, respectively, satisfying normality, and the homogeneity test result was 0.767, satisfying homogeneity of variance, and two independent samples were used t-test,  $p<0.05$ , which was statistically significant.

#### Statistical analysis of changes in inflammatory factor protein content in animal brains

| Group   | Protein      | Number of examples | $\bar{x}\pm s/M(P25\sim P75)$ | $t/z$  | $p$   |
|---------|--------------|--------------------|-------------------------------|--------|-------|
| Control | TNF          | 6                  | 0.354±0.050                   | -5.272 | 0.000 |
| Anxiety |              | 6                  | 0.605±0.106                   |        |       |
| Control | IL-1 $\beta$ | 6                  | 0.465(0.456,0.540)            | -2.882 | 0.004 |
| Anxiety |              | 6                  | 0.931(0.703,1.155)            |        |       |
| Control | IL-6         | 6                  | 0.623(0.540,0.681)            | -2.882 | 0.004 |
| Anxiety |              | 6                  | 0.807(0.687,1.000)            |        |       |

The normality test results of TNF protein in group C and group A were 0.266 and 0.257, respectively, which

met the normality, and the homogeneity test result was 0.151, which satisfied the homogeneity of variance, and the difference was statistically significant by using two independent samples t-test,  $p < 0.05$ . The normality test results of IL-1 $\beta$  protein in group C and group A were 0.022 and 0.726, respectively, which did not meet the normality, and the homogeneity test result was 0.039, which did not meet the homogeneity of variance, and two independent samples were used as nonparametric Mann-Whitney U,  $p < 0.05$ , and the difference was statistically significant. The results of IL-6 protein normality test in group C and group A were 0.082 and 0.007, respectively, which did not meet the normality, and the homogeneity test result was 0.155, satisfying the homogeneity of variance, and two independent samples were used nonparametric Mann-Whitney U,  $p < 0.05$ , and the difference was statistically significant.

#### Statistical analysis of changes in the content of inflammatory factors in the brain of animals

| Group   | Protein      | Number of examples | $\bar{x} \pm s / M(P25 \sim P75)$ | $t/z$  | $p$   |
|---------|--------------|--------------------|-----------------------------------|--------|-------|
| Control | TNF          | 5                  | 12.682(12.171,13.273)             | -2.402 | 0.016 |
| Anxiety |              | 5                  | 15.690(13.620,27.790)             |        |       |
| Control | IL-1 $\beta$ | 5                  | 1.361(1.303,1.644)                | -1.984 | 0.047 |
| Anxiety |              | 5                  | 1.736(1.486,3.363)                |        |       |
| Control | IL-6         | 5                  | 16.472 $\pm$ 2.074                | -3.945 | 0.004 |
| Anxiety |              | 5                  | 23.690 $\pm$ 3.527                |        |       |

The normality test results of TNF expression level in group C and group A were 0.118 and 0.636, respectively, which satisfied the normality, and the homogeneity test result was 0.030, which did not meet the homogeneity of variance, and two independent samples were used nonparametric Mann-Whitney U,  $p < 0.05$ , which were statistically significant. The results of IL-1 $\beta$  protein normality test in group C and group A were 0.118 and 0.008, respectively, which did not meet the normality, and the homogeneity test result was 0.050, which did not meet the homogeneity of variance, and two independent samples were used nonparametric Mann-Whitney U,  $p < 0.05$ , and the difference was statistically significant. The results of IL-6 protein normality test in group C and group A were 0.236 and 0.224, respectively, satisfying normality, and the homogeneity test result was 0.336, satisfying homogeneity of variance, and two independent samples were used t-test,  $p < 0.05$ , which was statistically significant.

#### Statistical analysis of changes in *EGFR* mRNA content in animal liver

| Group   | Number of examples | $M(P25 \sim P75)$  | $t$    | $p$   |
|---------|--------------------|--------------------|--------|-------|
| Control | 5                  | 0.960(0.925,1.030) | -2.611 | 0.009 |
| Anxiety | 5                  | 2.025(1.728,2.536) |        |       |

The normality test results of group C and group A were 0.960 and 0.971, respectively, satisfying normality, and the homogeneity test result was 0.025, which did not satisfy the homogeneity of variance, and two independent samples were used nonparametric Mann-Whitney U,  $p < 0.05$ , which were statistically significant.

#### Statistical analysis of changes in EGFR protein content in animal liver

| Group   | Protein | Number of examples | $\bar{x} \pm s$ / $M(P25 \sim P75)$ | $t/z$  | $p$   |
|---------|---------|--------------------|-------------------------------------|--------|-------|
| Control | p-EGFR  | 6                  | 0.915 $\pm$ 0.240                   | -2.986 | 0.014 |
| Anxiety |         | 6                  | 1.245 $\pm$ 0.128                   |        |       |
| Control | EGFR    | 6                  | 0.197 $\pm$ 0.031                   | 1.767  | 0.35  |
| Anxiety |         | 6                  | 0.158 $\pm$ 0.045                   |        |       |
| Control | p-EGFR  | 6                  | 4.775(3.575,5.624)                  | -2.882 | 0.004 |
| Anxiety | /EGFR   | 6                  | 7.754(6.248,10.471)                 |        |       |

The results of p-EGFR protein normality test in group C and group A were 0.609 and 0.848, respectively, which met the normality, and the homogeneity test result was 0.368, which satisfied the homogeneity of variance, and the difference was statistically significant by using two independent samples t-test,  $p < 0.05$ . The results of EGFR protein normality test in group C and group A were 0.410 and 0.255, respectively, satisfying normality, and the homogeneity test result was 0.351, satisfying homogeneity of variance, and two independent samples were used t-test,  $p < 0.05$ , which was statistically significant. The normality test results of p-EGFR/EGFR in group C and group A were 0.033 and 0.048, respectively, which did not meet the normality, and the homogeneity test result was 0.160, which satisfied the homogeneity of variance, and two independent samples were used nonparametric Mann-Whitney U,  $p < 0.05$ , which were statistically significant.

#### Statistical analysis of the mean optical density of p-EGFR immunohistochemistry in animal liver

| Group   | Number of examples | $\bar{x} \pm s$     | $t$   | $p$   |
|---------|--------------------|---------------------|-------|-------|
| Control | 8                  | 200.036 $\pm$ 6.878 | 5.820 | 0.000 |
| Anxiety | 8                  | 219.931 $\pm$ 6.793 |       |       |

The normality test results of group C and group A were 0.084 and 0.320, respectively, satisfying normality, and the homogeneity test result was 0.658, satisfying the homogeneity of variance, and the  $p < 0.05$  was used by the t-test of two independent samples, which was statistically significant.

#### Statistical analysis of the mean fluorescence intensity of p-EGFR immunofluorescence in animal liver

| Group   | Number of examples | $M(P25 \sim P75)$     | $z$    | $p$   |
|---------|--------------------|-----------------------|--------|-------|
| Control | 8                  | 8.762(8.069,10.621)   | -2.626 | 0.009 |
| Anxiety | 8                  | 32.398(13.577,67.678) |        |       |

The normality test results of group C and group A were 0.000 and 0.041, respectively, which did not meet the normality, and the homogeneity test result was 0.010, which did not meet the homogeneity of variance, and two independent samples of nonparametric Mann-Whitney U,  $p < 0.05$  were used, and the difference was statistically significant.

#### Statistical analysis of changes in *PIK3R1* mRNA content in animal brains

| Group   | Number of examples | $\bar{x} \pm s$   | $t$    | $p$   |
|---------|--------------------|-------------------|--------|-------|
| Control | 5                  | 0.972 $\pm$ 0.056 | -4.582 | 0.002 |

The normality test results of group C and group A were 0.960 and 0.764, respectively, satisfying normality, and the homogeneity test result of variance was 0.054, satisfying the homogeneity of variance, and two independent samples were used t-test,  $p < 0.05$ , which was statistically significant.

Statistical analysis of changes in PI3K protein content in animal liver

| Group   | Protein | Number of examples | $\bar{x} \pm s / M(P25 \sim P75)$ | $t/z$  | $p$   |
|---------|---------|--------------------|-----------------------------------|--------|-------|
| Control | p-PI3K  | 6                  | 0.516(0.482,0.664)                | -2.882 | 0.005 |
| Anxiety |         | 6                  | 0.818(0.752,0.931)                |        |       |
| Control | PI3K    | 6                  | 0.402±0.068                       | -0.884 | 0.398 |
| Anxiety |         | 6                  | 0.451±0.117                       |        |       |
| Control | p-PI3K  | 6                  | 1.393±0.173                       | -3.555 | 0.005 |
| Anxiety | /PI3K   | 6                  | 1.918±0.328                       |        |       |

The normality test results of p-PI3K protein in group C and group A were 0.047 and 0.669, respectively, which did not meet the normality, and the homogeneity of variance test result was 0.919, which satisfied the homogeneity of variance, and two independent samples were used Mann-Whitney U,  $p < 0.05$ , which were statistically significant. The results of PI3K protein normality test in group C and group A were 0.677 and 0.178, respectively, which met the normality, and the homogeneity test result was 0.162, which satisfied the homogeneity of variance, and the difference was statistically significant by using two independent samples t-test,  $p < 0.05$ . The normality test results of p-PI3K/PI3K in group C and group A were 0.450 and 0.962, respectively, satisfying normality, and the homogeneity test result was 0.194, satisfying the homogeneity of variance, and the  $p < 0.05$  was used for the t-test of two independent samples, which was statistically significant.

Statistical analysis of changes in *AKT1* mRNA content in animal brains

| Group   | Number of examples | $\bar{x} \pm s$ | $t$    | $p$   |
|---------|--------------------|-----------------|--------|-------|
| Control | 5                  | 0.972±0.056     | -3.229 | 0.012 |
| Anxiety | 5                  | 1.251±0.185     |        |       |

The normality test results of group C and group A were 0.960 and 0.591, respectively, satisfying normality, and the homogeneity test result was 0.064, satisfying the homogeneity of variance, and the two independent samples t-test,  $p < 0.05$ , were statistically significant.

Statistical analysis of changes in AKT protein content in animal liver

| Group   | Protein | Number of examples | $\bar{x} \pm s$ | $t$    | $p$   |
|---------|---------|--------------------|-----------------|--------|-------|
| Control | p-AKT   | 6                  | 0.852±0.189     | -2.008 | 0.072 |
| Anxiety |         | 6                  | 1.043±0.135     |        |       |
| Control | AKT     | 6                  | 1.464±0.254     | 1.047  | 0.320 |
| Anxiety |         | 6                  | 1.340±0.136     |        |       |
| Control | p-AKT   | 6                  | 0.588±0.130     | -3.186 | 0.010 |
| Anxiety | /AKT    | 6                  | 0.778±0.064     |        |       |

The normality test results of p-AKT protein in group C and group A were 0.456 and 0.463, respectively,



satisfying normality, and the homogeneity test result was 0.291, satisfying the homogeneity of variance, and the difference was statistically significant by using two independent samples t-test,  $p<0.05$ . The results of AKT protein normality test in group C and group A were 0.725 and 0.559, respectively, satisfying normality, and the homogeneity test result was 0.137, satisfying homogeneity of variance, and the difference was statistically significant by using two independent samples t-test,  $p<0.05$ . The results of p-AKT/AKT normality test in group C and group A were 0.310 and 0.791, respectively, satisfying normality, and the homogeneity test result was 0.156, satisfying homogeneity of variance, and two independent samples were used t-test,  $p<0.05$ , which was statistically significant.

Statistical analysis of changes in *NFKB1A* mRNA content in animal liver

| Group   | Number of examples | $M(P25\sim P75)$   | $z$    | $p$   |
|---------|--------------------|--------------------|--------|-------|
| Control | 5                  | 0.960(0.925,1.025) | -2.611 | 0.009 |
| Anxiety | 5                  | 1.492(1.431,2.380) |        |       |

The normality test results of group C and group A were 0.960 and 0.066, respectively, satisfying normality, and the homogeneity test result was 0.034, which did not satisfy the homogeneity of variance, and two independent samples were used nonparametric Mann-Whitney U,  $p<0.05$ , which were statistically significant.

Statistical analysis of changes in IKB $\alpha$  protein content in animal liver

| Group   | Protein        | Number of examples | $\bar{x}\pm s$    | $t$    | $p$   |
|---------|----------------|--------------------|-------------------|--------|-------|
| Control | p-IKB $\alpha$ | 6                  | 0.461 $\pm$ 0.592 | -1.193 | 0.260 |
| Anxiety |                | 6                  | 0.506 $\pm$ 0.071 |        |       |
| Control | IKB $\alpha$   | 6                  | 1.154 $\pm$ 0.127 | 2.337  | 0.042 |
| Anxiety |                | 6                  | 0.887 $\pm$ 0.249 |        |       |
| Control | p-IKB $\alpha$ | 6                  | 0.401 $\pm$ 0.044 | -3.548 | 0.005 |
| Anxiety | / IKB $\alpha$ | 6                  | 0.593 $\pm$ 0.125 |        |       |

The results of p-IKB $\alpha$  protein normality test in group C and group A were 0.089 and 0.661, respectively, which met the normality, and the homogeneity of variance test result was 0.577, satisfying the homogeneity of variance, and the difference was statistically significant by using two independent samples t-test,  $p<0.05$ . The results of IKB $\alpha$  protein normality test in group C and group A were 0.339 and 0.194, respectively, which met the normality, and the homogeneity test result was 0.450, which satisfied the homogeneity of variance, and the difference was statistically significant by using two independent samples t-test,  $p<0.05$ . The normality test results of p-IKB $\alpha$ /IKB $\alpha$  in group C and group A were 0.061 and 0.695, respectively, satisfying normality, and the homogeneity test result was 0.086, satisfying the homogeneity of variance, and the  $p<0.05$  was used to test two independent samples t, which was statistically significant.

Statistical analysis of changes in *NFkB1* mRNA content in animal liver

| Group   | Number of examples | $\bar{x}\pm s$    | $t$    | $p$   |
|---------|--------------------|-------------------|--------|-------|
| Control | 5                  | 0.972 $\pm$ 0.056 | -3.078 | 0.015 |
| Anxiety | 5                  | 1.141 $\pm$ 0.109 |        |       |

The normality test results of group C and group A were 0.960 and 0.413, respectively, satisfying normality, and the homogeneity test result was 0.070, satisfying the homogeneity of variance, and the  $p < 0.05$  was used for the t-test of two independent samples, which was statistically significant.

Statistical analysis of changes in p50 protein content in animal liver

| Group   | Protein | Number of examples | $\bar{x} \pm s / M(P25 \sim P75)$ | $t/z$  | $p$   |
|---------|---------|--------------------|-----------------------------------|--------|-------|
| Control | p-p50   | 6                  | 0.563 $\pm$ 0.082                 | -3.093 | 0.010 |
| Anxiety |         | 6                  | 0.759 $\pm$ 0.131                 |        |       |
| Control | p50     | 6                  | 0.341 $\pm$ 0.031                 | 1.549  | 0.152 |
| Anxiety |         | 6                  | 0.305 $\pm$ 0.047                 |        |       |
| Control | p-p50   | 6                  | 1.710(1.343,1.895)                | -2.562 | 0.010 |
| Anxiety | /p50    | 6                  | 2.223(2.013,3.300)                |        |       |

The results of p-p50 protein normality test in group C and group A were 0.920 and 0.446, respectively, satisfying normality, and the homogeneity test result of variance was 0.257, satisfying the homogeneity of variance, and two independent samples were used t-test,  $p < 0.05$ , which was statistically significant. The results of p50 protein normality test in group C and group A were 0.137 and 0.768, respectively, satisfying normality, and the homogeneity test result was 0.319, satisfying the homogeneity of variance, and two independent samples were used for t-test,  $p < 0.05$ , which was statistically significant. The normality test results of p-p50/p50 in group C and group A were 0.806 and 0.115, respectively, satisfying normality, and the homogeneity test result was 0.050, which did not meet the homogeneity of variance, and two independent samples were used nonparametric Mann-Whitney U,  $p < 0.05$ , which were statistically significant.

Statistical analysis of the average immunohistochemical optical density of p-p50 in animal liver

| Group   | Number of examples | $M(P25 \sim P75)$     | $z$    | $p$   |
|---------|--------------------|-----------------------|--------|-------|
| Control | 8                  | 9.678(2.696,12.668)   | -2.338 | 0.021 |
| Anxiety | 8                  | 16.455(11.831,46.304) |        |       |

The normality test results of group C and group A were 0.807 and 0.058, respectively, satisfying normality, and the homogeneity test result was 0.009, which did not satisfy the homogeneity of variance, and two independent samples were used nonparametric Mann-Whitney U,  $p < 0.05$ , which were statistically significant.

Statistical analysis of the mean fluorescence intensity of p-p50 immunofluorescence histochemistry in animal liver

| Group   | Number of examples | $\bar{x} \pm s$    | $t$    | $p$   |
|---------|--------------------|--------------------|--------|-------|
| Control | 8                  | 3.633 $\pm$ 1.348  | -8.159 | 0.021 |
| Anxiety | 8                  | 12.706 $\pm$ 2.842 |        |       |

The normality test results of group C and group A were 0.687 and 0.313, respectively, satisfying normality, and the homogeneity test result was 0.228, satisfying the homogeneity of variance, and the  $p < 0.05$  was used

to test two independent samples, which were statistically significant.

#### Statistical analysis of changes in *RELA* mRNA content in animal brains

| Group   | Number of examples | $\bar{x} \pm s$ | <i>t</i> | <i>p</i> |
|---------|--------------------|-----------------|----------|----------|
| Control | 5                  | 0.972±0.056     | -2.172   | 0.041    |
| Anxiety | 5                  | 1.451±0.437     |          |          |

The normality test results of group C and group A were 0.960 and 0.126, respectively, satisfying normality, and the homogeneity of variance test results were 0.089, satisfying the homogeneity of variance, and the  $p < 0.05$  was used for the t-test of two independent samples, which was statistically significant.

#### Statistical analysis of changes in p65 protein content in animal liver

| Group   | Protein | Number of examples | $\bar{x} \pm s / M(P25 \sim P75)$ | <i>t/z</i> | <i>p</i> |
|---------|---------|--------------------|-----------------------------------|------------|----------|
| Control | p-p65   | 6                  | 0.428(0.367,0.604)                | -2.562     | 0.010    |
| Anxiety |         | 6                  | 0.909(0.834,0.947)                |            |          |
| Control | P65     | 6                  | 0.603±0.082                       | 0.492      | 0.633    |
| Anxiety |         | 6                  | 0.581±0.073                       |            |          |
| Control | p-p65   | 6                  | 0.668(0.553,1.184)                | -2.082     | 0.037    |
| Anxiety | /p65    | 6                  | 1.577(1.330,1.767)                |            |          |

The results of p-p65 protein normality test in group C and group A were 0.029 and 0.131, respectively, which did not meet the normality, and the homogeneity test result was 0.254, which satisfied the homogeneity of variance, and two independent samples were used nonparametric Mann-Whitney U,  $p < 0.05$ , and the difference was statistically significant. The results of p65 protein normality test in group C and group A were 0.097 and 0.819, respectively, satisfying normality, and the homogeneity test result of variance was 0.745, satisfying the homogeneity of variance, and the difference was statistically significant by using two independent samples t-test,  $p < 0.05$ . The normality test results of p-p65/p65 in group C and group A were 0.016 and 0.936, respectively, which did not meet the normality, and the homogeneity of variance test result was 0.404, which satisfied the homogeneity of variance, and two independent samples were used Mann-Whitney U,  $p < 0.05$ , which were statistically significant.

#### Statistical analysis of the immunohistochemical mean optical density of p-p65 protein in animal liver

| Group   | Number of examples | <i>M</i> (P25~P75)    | <i>z</i> | <i>p</i> |
|---------|--------------------|-----------------------|----------|----------|
| Control | 8                  | 7.460(4.492,8.547)    | -2.195   | 0.001    |
| Anxiety | 8                  | 13.026(11.586,13.641) |          |          |

The normality test results of group C and group A were 0.782 and 0.001, respectively, which did not meet the normality, and the homogeneity of variance test result was 0.769, which satisfied the homogeneity of variance, and two independent samples were used nonparametric Mann-Whitney U,  $p < 0.05$ , and the difference was statistically significant.

#### Statistical analysis of the mean fluorescence intensity of p-p65 immunofluorescence histochemistry in animal liver

| Group   | Number of examples | $M(P25\sim P75)$      | $z$    | $p$   |
|---------|--------------------|-----------------------|--------|-------|
| Control | 8                  | 0.480(0.234,0.566)    | -3.363 | 0.001 |
| Anxiety | 8                  | 32.388(13.577,67.678) |        |       |

The normality test results of group C and group A were 0.556 and 0.041, respectively, which did not meet the normality, and the homogeneity of variance test result was 0.004, which did not meet the homogeneity of variance, and two independent samples were used nonparametric Mann-Whitney U,  $p<0.05$ , and the difference was statistically significant.

| Statistical analysis of changes in inflammatory factor protein content in animal liver |              |                    |                               |        |       |
|----------------------------------------------------------------------------------------|--------------|--------------------|-------------------------------|--------|-------|
| Group                                                                                  | Protein      | Number of examples | $\bar{x}\pm s/M(P25\sim P75)$ | $t/z$  | $p$   |
| Control                                                                                | TNF          | 6                  | 0.573 $\pm$ 0.164             | -3.722 | 0.004 |
| Anxiety                                                                                |              | 6                  | 0.858 $\pm$ 0.090             |        |       |
| Control                                                                                | IL-1 $\beta$ | 6                  | 0.604(0.530,0.706)            | -2.242 | 0.025 |
| Anxiety                                                                                |              | 6                  | 0.763(0.742,0.933)            |        |       |
| Control                                                                                | IL-6         | 6                  | 0.735 $\pm$ 0.145             | -5.481 | 0.000 |
| Anxiety                                                                                |              | 6                  | 1.101 $\pm$ 0.076             |        |       |

The normality test results of TNF protein in group C and group A were 0.545 and 0.440, respectively, which met the normality, and the homogeneity test result was 0.216, which satisfied the homogeneity of variance, and the difference was statistically significant by using two independent samples t-test,  $p<0.05$ . The normality test results of IL-1 $\beta$  protein in group C and group A were 0.915 and 0.033, respectively, which did not meet the normality, and the homogeneity test result was 0.891, which satisfied the homogeneity of variance, and two independent samples were used nonparametric Mann-Whitney U,  $p<0.05$ , which were statistically significant. The results of IL-6 protein normality test in group C and group A were 0.406 and 0.438, respectively, satisfying normality, and the homogeneity test result was 0.347, satisfying the homogeneity of variance, and the difference was statistically significant by using two independent samples t-test,  $p<0.05$ .

| Statistical analysis of changes in the content of inflammatory factors in animal serum |              |                    |                    |        |       |
|----------------------------------------------------------------------------------------|--------------|--------------------|--------------------|--------|-------|
| Group                                                                                  | Protein      | Number of examples | $\bar{x}\pm s$     | $t$    | $p$   |
| Control                                                                                | TNF          | 6                  | 44.231 $\pm$ 1.044 | -6.796 | 0.000 |
| Anxiety                                                                                |              | 6                  | 53.573 $\pm$ 2.890 |        |       |
| Control                                                                                | IL-1 $\beta$ | 5                  | 3.962 $\pm$ 0.593  | -2.672 | 0.028 |
| Anxiety                                                                                |              | 5                  | 5.543 $\pm$ 1.182  |        |       |
| Control                                                                                | IL-6         | 6                  | 16.471 $\pm$ 2.076 | 3.650  | 0.004 |
| Anxiety                                                                                |              | 6                  | 23.689 $\pm$ 3.527 |        |       |

The normality test results of TNF protein in group C and group A were 0.079 and 0.457, respectively, which met the normality, and the homogeneity test result was 0.117, satisfying the homogeneity of variance, and the  $p<0.05$  of two independent samples were used to test the t, which was statistically significant. The results of IL-1 $\beta$  protein normality test in group C and group A were 0.122 and 0.666, respectively, satisfying normality, and the homogeneity test result was 0.175, satisfying the homogeneity of variance, and the difference was statistically significant by using two independent samples t-test,  $p<0.05$ . The results of IL-6

---

protein normality test in group C and group A were 0.224 and 0.234, respectively, satisfying normality, and the homogeneity test result was 0.337, satisfying homogeneity of variance, and two independent samples were used t-test,  $p < 0.05$ , which was statistically significant.
